# Supplementary material
Source: PubMed Central journal article supplement (PMC6453177)
Supplement: ESO_679577_Supplemental_Material.pdf [file ESO_679577_Supplemental_Material.pdf]

Supplemental Table 1. Baseline characteristics of patients in East Europe and other parts of Europe.

| Variables                                   | EAST EUROPE |            |         | WEST, NORTH, SOUTH EUROPE |            |         |
|---------------------------------------------|-------------|------------|---------|---------------------------|------------|---------|
|                                             | Women       | Men        | p-value | Women                     | Men        | p-value |
| Age (years) (mean±SD)                       | 79.9±8.3    | 71.2±11.8  | <0.001  | 75.7±9.24                 | 79.4±8.6   | <0.001  |
| Type of AF, n (%):                          |             |            |         |                           |            |         |
| Paroxysmal                                  | 8 (24.2)    | 10 (27.0)  | 1.0     | 190 (38.8)                | 152 (37.3) | 0.679   |
| Permanent                                   | 23 (69.7)   | 25 (67.6)  | 1.0     | 204 (41.6)                | 187 (46.1) | 0.199   |
| Persistent                                  | 1 (3.0)     | 2 (5.4)    | 1.0     | 99 (20.2)                 | 68 (16.7)  | 0.197   |
| Concomitant medical history, n (%):         |             |            |         |                           |            |         |
| Hypertension                                | 32 (97.0)   | 33 (89.2)  | 0.361   | 401 (82.5)                | 320 (78.8) | 0.172   |
| Hyperlipidemia                              | 10 (32.3)   | 14 (37.8)  | 0.799   | 150 (30.9)                | 155 (38.3) | 0.023   |
| Diabetes mellitus                           | 13 (39.4)   | 7 (18.9)   | 0.069   | 123 (25.3)                | 113 (27.8) | 0.402   |
| History of stroke/TIA                       | 13 (39.4)   | 11 (29.7)  | 0.455   | 118 (24.4)                | 113 (27.9) | 0.25    |
| Chronic hearth failure                      | 12 (36.4)   | 15 (40.5)  | 0.808   | 69 (14.1)                 | 69 (17.0)  | 0.228   |
| History of myocardial infarction            | 3 (9.1)     | 6 (16.2)   | 0.485   | 65 (13.4)                 | 88 (21.7)  | 0.001   |
| History of peripheral artery disease        | 4 (12.1)    | 12 (32.4)  | 0.051   | 32 (6.6)                  | 44 (10.8)  | 0.03    |
| Aortic atherosclerosis                      | 4 (12.1)    | 7 (18.9)   | 0.522   | 40 (8.1)                  | 51 (12.6)  | 0.034   |
| Atherosclerosis* in other sites             | 17 (56.7)   | 24 (66.7)  | 0.452   | 97 (20.3)                 | 88 (21.9)  | 0.618   |
| Pacemaker                                   | 4 (12.1)    | 8 (21.6)   | 0.353   | 31 (6.3)                  | 38 (9.4)   | 0.102   |
| Smoking                                     | 0           | 13 (35.1)  | <0.001  | 65 (13.4)                 | 168 (41.4) | <0.001  |
| Alcoholism                                  | 0           | 10 (27)    | 0.001   | 6 (1.2%)                  | 34 (8.4)   | <0.001  |
| Previous use of oral anticoagulants, n (%): | 13 (41.9)   | 18 (48.6)  | 0.631   | 116 (23.9)                | 126 (31.0) | 0.019   |
| Previous use of antiplatelets, n (%)        | 16 (51.6)   | 18 (48.6)  | 1.0     | 221 (45.5)                | 186 (45.9) | 0.893   |
| Previous use of statins, n (%)              | 7 (22.6)    | 13 (35.1)  | 0.296   | 104 (21.4)                | 129 (31.8) | 0.001   |
| Lesion site and size, n (%):                |             |            |         |                           |            |         |
| Small lesion                                | 15 (45.5)   | 19 (50.0)  | 0.813   | 161 (32.8)                | 163 (40.0) | 0.026   |
| Medium lesion                               | 13 (39.4)   | 16 (42.1)  | 1.0     | 177 (36.0)                | 143 (35.1) | 0.78    |
| Large anterior lesion                       | 2 (6.1)     | 0          | 0.212   | 122 (24.8)                | 78 (19.2)  | 0.044   |
| Large posterior lesion                      | 34 (6.1)    | 25 (5.4)   | 0.687   | 29 (5.9)                  | 24 (5.9)   | 1.0     |
| Leukoaraiosis, n (%)                        | 21 (63.6)   | 18 (48.6)  | 0.236   | 231 (47.6)                | 147 (36.6) | 0.001   |
| NIHSS, mean±SD                              | 10.0±7.2    | 5.8±4.96   | 0.006   | 8.5±6.0                   | 10.2±7.4   | 0.001   |
| Systolic AP, mean±SD                        | 161.8±23.2  | 148.8±29.8 | 0.04    | 151.6±25.4                | 149.0±24.9 | 0.126   |
| Diastolic AP, mean±SD                       | 89.6±20.3   | 87.3±13.6  | 0.58    | 82.4±13.9                 | 82.3±13.9  | 0.874   |
| Laboratory data on admission, mean±SD:      |             |            |         |                           |            |         |
| Hemoglobin (g/dL), mean±SD                  | 12.8±1.44   | 14.7±1.9   | <0.001  | 12.9±3.4                  | 13.6±1.8   | <0.001  |
| Glycemia (mg/dL), mean±SD                   | 137.0±47.7  | 116.7±37.6 | 0.056   | 130.4±47.6                | 132.4±49.2 | 0.543   |
| Total cholesterol (mg/dL), mean±SD          | 190.5±45.4  | 172.1±37.8 | 0.116   | 171.9±41.2                | 188.2±41.1 | <0.001  |
| INR, mean±SD                                | 1.25±0.56   | 1.5±0.86   | 0.098   | 1.26±0.77                 | 1.26±0.46  | 0.963   |

\*Presence of internal carotid/vertebral artery stenosis ≥50%

AF=atrial fibrillation

AP=arterial pressure

INR= International Normalized Ratios at admission for all patients

TIA=transient ischemic attack

Supplemental Table 2. Treatment of patients in the acute period of stroke and outcome effects at 90 days in patients of East Europe and other parts of Europe.

| Variables | EAST  |     |    | WEST, NORTH, SOUTH EUROPE |     |         |
|-----------|-------|-----|----|---------------------------|-----|---------|
|           | Women | Men | p- | Women                     | Men | p-value |

|                                                              |           |           | value |            |            |        |
|--------------------------------------------------------------|-----------|-----------|-------|------------|------------|--------|
| Revascularization therapy (IV and/or IA), n (%)              | 7 (21.2)  | 6 (16.2)  | 0.76  | 97 (19.8)  | 84 (20.7)  | 0.739  |
| HT on neuroimaging*, n (%)                                   | 0         | 2 (5.4)   | 0.494 | 67 (13.6)  | 52 (12.8)  | 0.767  |
| hemorrhagic infarction, n (%)                                | 0         | 1 (2.7)   | 1.0   | 47 (11.0)  | 36 (10.4)  | 0.817  |
| parenchymal hematoma, n (%)                                  | 0         | 1 (2.7)   | 1.0   | 19 (4.5)   | 16 (4.6)   | 1.0    |
| Therapy with anticoagulants after index stroke, n (%)        | 32 (97.0) | 35 (92.1) | 0.618 | 344 (70.1) | 317 (77.7) | 0.01   |
| Type of anticoagulation, n (%):                              |           |           |       |            |            |        |
| LMWH                                                         | 22 (66.7) | 12 (31.6) | 0.004 | 45 (9.2)   | 32 (7.8)   | 0.48   |
| Oral anticoagulants (warfarin/DOA)                           | 4 (12.1)  | 7 (18.4)  | 0.527 | 179 (36.5) | 172 (42.2) | 0.08   |
| Bridging therapy (LMWH, followed by oral anticoagulants)     | 6 (18.2)  | 16 (42.1) | 0.04  | 120 (24.4) | 113 (27.7) | 0.267  |
| No anticoagulants at all                                     | 1 (3.0)   | 3 (7.9)   | 0.618 | 147 (29.9) | 91 (22.3)  | 0.01   |
| Time when anticoagulant therapy was initiated, mean±SD, days | 3.67±7.5  | 3.95±15.9 | 0.923 | 6.52±12.3  | 6.88±11.5  | 0.65   |
| Outcome effects, n (%):                                      |           |           |       |            |            |        |
| Outcome ischemic events                                      | 4 (12.1)  | 2 (5.3)   | 0.406 | 39 (7.9)   | 26 (6.4)   | 0.438  |
| Symptomatic HT                                               | 0         | 3 (7.9)   | 0.243 | 18 (3.7)   | 14 (3.4)   | 1.0    |
| Mortality at 90 days                                         | 0         | 1 (2.6)   | 1.0   | 62 (12.7)  | 45 (11.1)  | 0.47   |
| Unfavorable functional outcome (mRS 3-6) at 90 days          | 16 (48.5) | 10 (26.3) | 0.083 | 285 (58.5) | 171 (42.1) | <0.001 |

\*Neuroimaging performed after 24-72 hours from stroke onset

DOA=direct oral anticoagulants

HT=hemorrhagic transformation (either hemorrhagic infarction or parenchymal hematoma)

IA=intra-arterial revascularization therapy

IV=intravenous revascularization therapy

LMWH=low molecular weight heparin
